# Supplementary material
Source: PubMed Central journal article supplement (PMC9937920)
Supplement: 41366_2022_1246_MOESM1_ESM.pdf [file 41366_2022_1246_MOESM1_ESM.pdf]

## Supplementary Information for:

**Circulating adipokine levels and COVID-19 severity in hospitalized patients**

Flikweert et al.,

**This pdf file includes:**

**Supplementary Figure 1:** The number of symptom days COVID-19 patients had before admission to either the general ward or ICU during the 1<sup>st</sup> and 2<sup>nd</sup> wave of the COVID-19 pandemic.

**Supplementary Figure 2:** BMI distribution of included subjects separated by severity

**Supplementary Table 1:** Baseline patients' clinical characteristics, comorbidities, therapies and outcome stratified between low and high BMI based on the median BMI of hospitalized patients.(27.2kg/m<sup>2</sup>).

**Supplementary Figure 1.**

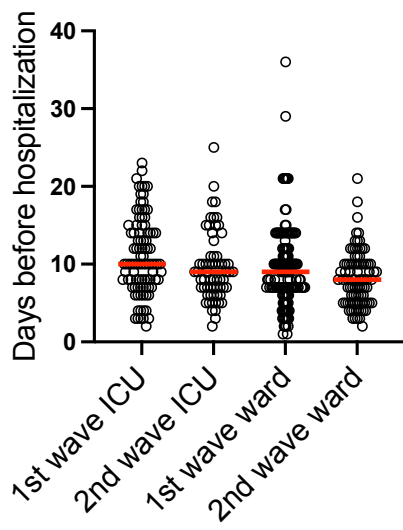

**Supplemental figure 1.** The number of symptom days COVID-19 patients had before admission to either the general ward or ICU during the 1<sup>st</sup> and 2<sup>nd</sup> wave of the COVID-19 pandemic. Each dot represents an individual patient. All patients in our cohort for which we had symptom information were included in this analysis (n=424), the red line indicates the median.

Supplementary Figure 2.

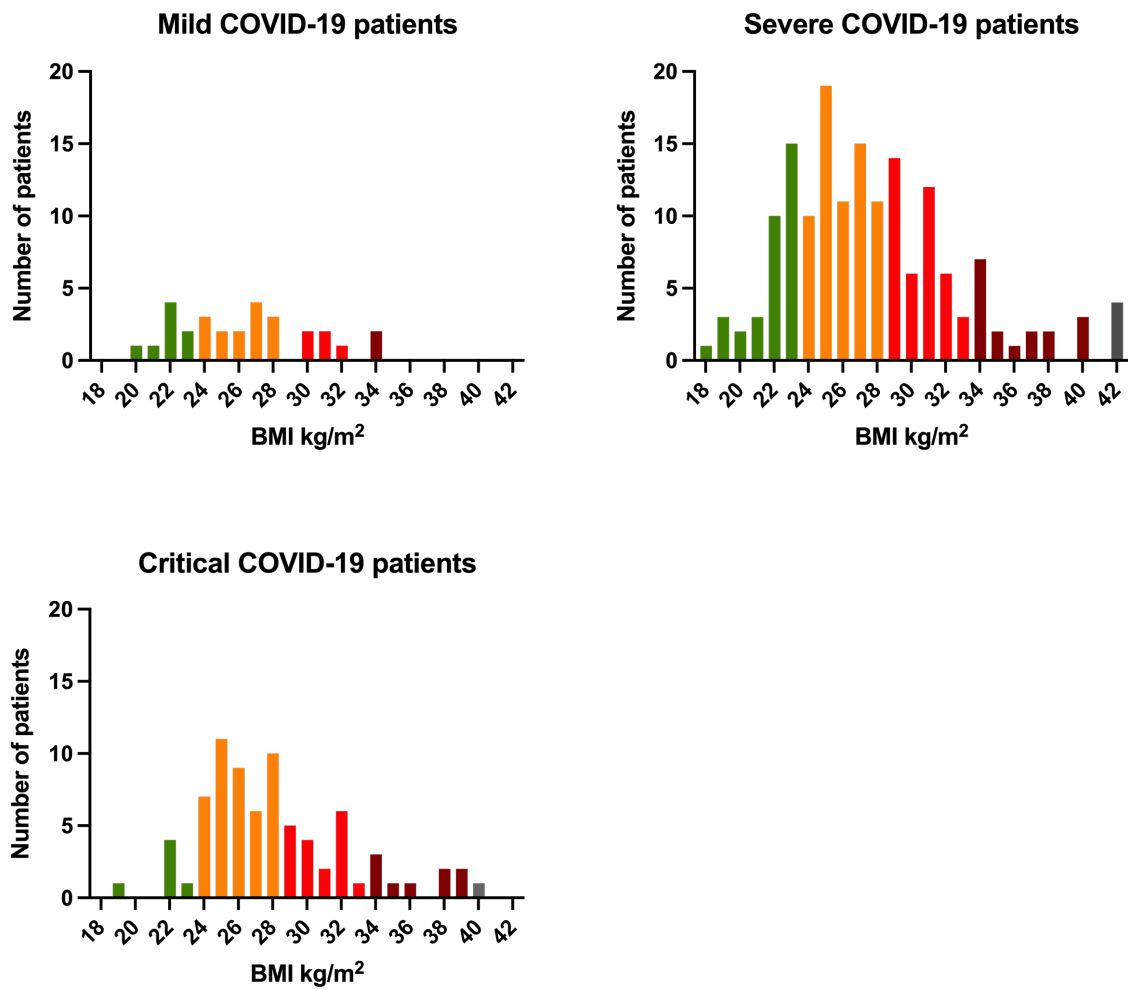

**Supplemental Figure 2.** BMI distribution of included subjects separated by severity; mild (home), severe (ward), and critical (ICU). The bar colours represent the extent of obesity based on the WHO classification. Green=normal weight, orange=overweight, red=obese and grey=morbid obese.

**Supplemental Table 1.** Baseline patients' clinical characteristics, comorbidities, therapies and outcome stratified between low and high BMI based on the median BMI of hospitalized patients.(27.2kg/m<sup>2</sup>).

| Variable                                            | LOW BMI           |                     | HIGH BMI          |                     | A vs B<br>p value | C vs D<br>p value |
|-----------------------------------------------------|-------------------|---------------------|-------------------|---------------------|-------------------|-------------------|
|                                                     | A Severe COVID-19 | B Critical COVID-19 | C Severe COVID-19 | D Critical COVID-19 |                   |                   |
|                                                     | Low BMI<br>n= 83  | Low BMI<br>n= 32    | High BMI<br>n= 76 | High BMI<br>n= 39   |                   |                   |
| <b>DEMOGRAPHICS</b>                                 |                   |                     |                   |                     |                   |                   |
| Age (years)                                         | 71 [58-79]        | 70 [63-75]          | 66 [54-71]        | 62 [56-72]          | 0.750             | 0.772             |
| Male, n (%)                                         | 52 (62.7)         | 26 (81.3)           | 34 (44.7)         | 22 (56.4)           | 0.056             | 0.236             |
| BMI (kg/m <sup>2</sup> )                            | 24.3 [22.7-25.6]  | 24.8 [23.7-25.9]    | 30.7 [28.7-33.6]  | 30.1 [28.3-33.6]    | 0.147             | 0.327             |
| <b>COMORBIDITIES</b>                                |                   |                     |                   |                     |                   |                   |
| Pulmonary disease, n (%)                            | 13 (15.7)         | 9 (28.1)            | 22 (28.9)         | 9 (23.1)            | 0.128             | 0.502             |
| Chronic cardiac disease, n (%)                      | 25 (30.1)         | 10 (31.3)           | 15 (19.7)         | 11 (28.2)           | 0.906             | 0.304             |
| Chronic kidney disease, n (%)                       | 10 (12.0)         | 1 (3.1)             | 8 (10.5)          | 3 (7.7)             | 0.286             | 0.747             |
| Hypertension, n (%)                                 | 28 (33.7)         | 10 (31.3)           | 27 (35.5)         | 15 (38.5)           | 0.800             | 0.757             |
| Diabetes, n (%)                                     | 21 (25.3)         | 1 (3.1)             | 14 (18.4)         | 10 (25.6)           | 0.007             | 0.367             |
| <b>CLINICAL COURSE</b>                              |                   |                     |                   |                     |                   |                   |
| O2 need at hospital admission (L/min)               | 2 [0-4]           | 12 [3-15]           | 2 [0-4]           | 6 [3-15]            | <0.001            | <0.001            |
| Hospital length of stay, days                       | 5 [4-9]           | 16 [9-24]           | 5 [4-9]           | 18 [14-25]          | <0.001            | <0.001            |
| <b>TREATMENT</b>                                    |                   |                     |                   |                     |                   |                   |
| Antiviral                                           | 13 (15.7)         | 6 (18.8)            | 22 (28.9)         | 4 (10.3)            | 0.690             | 0.023             |
| Antibiotics                                         | 54 (65.1)         | 32 (100)            | 45 (59.2)         | 39 (100)            | <0.001            | <0.001            |
| Corticosteroids                                     | 26 (31.3)         | 16 (50)             | 28 (36.8)         | 15 (38.5)           | 0.062             | 0.865             |
| Antifungal therapy                                  | 0 (0)             | 6 (18.8)            | 0 (0)             | 11 (28.2)           | <0.001            | <0.001            |
| Chloroquine                                         | 41 (49.4)         | 17 (53.1)           | 32 (42.1)         | 22 (56.4)           | 0.720             | 0.146             |
| <b>ICU CHARACTERISTICS</b>                          |                   |                     |                   |                     |                   |                   |
| APACHE II score                                     |                   | 18 [15-21]          |                   | 15 [11-20]          |                   |                   |
| ICU length of stay, days                            |                   | 10 [5-21]           |                   | 13 [8-25]           |                   |                   |
| Duration of MV, days                                |                   | 10 [4-20]           |                   | 11 [7-24]           |                   |                   |
| PaO <sub>2</sub> /FiO <sub>2</sub> after intubation |                   | 127 [101-151]       |                   | 140 [96-201]        |                   |                   |
| Prone ventilation                                   |                   | 19 (65.5)           |                   | 28 (71.8)           |                   |                   |
| Tracheostomy                                        |                   | 1 (3.1)             |                   | 5 (12.8)            |                   |                   |
| ECLS                                                |                   | 1 (3.1)             |                   | 1 (2.6)             |                   |                   |
| <b>COMPLICATIONS</b>                                |                   |                     |                   |                     |                   |                   |
| Pulmonary Embolism                                  | 4 (4.8)           | 11 (34.4)           | 1 (1.3)           | 7 (17.9)            | <0.001            | 0.001             |
| Pneumothorax                                        | 1 (1.2)           | 1 (3.1)             | 0 (0)             | 1 (2.6)             | 0.481             | 0.339             |
| Stroke                                              | 1 (1.2)           | 5 (15.6)            | 0 (0)             | 2 (5.1)             | 0.006             | 0.113             |
| Cardiac arrhythmia                                  | 4 (4.8)           | 11 (34.4)           | 2 (2.6)           | 5 (12.8)            | <0.001            | 0.043             |
| Cardiac ischemia                                    | 3 (3.6)           | 1 (3.1)             | 2 (2.6)           | 3 (7.7)             | 0.999             | 0.335             |
| Bacteremia*                                         | 0 (0)             | 3 (9.4)             | 0 (0)             | 6 (15.4)            | 0.020             | 0.001             |
| Acute kidney injury**                               | 8 (9.6)           | 15 (46.9)           | 3 (3.9)           | 20 (51.3)           | <0.001            | <0.001            |
| Renal replacement therapy                           | 0 (0)             | 6 (18.8)            | 0 (0)             | 7 (17.9)            | <0.001            | <0.001            |
| Liver dysfunction***                                | 14 (16.9)         | 11 (34.4)           | 10 (13.2)         | 23 (59.0)           | 0.041             | <0.001            |
| <b>OUTCOME</b>                                      |                   |                     |                   |                     |                   |                   |
| Death                                               |                   | 15 (46.9)           |                   | 16 (41.0)           |                   |                   |
| <b>ADIPOKINES/CYTOKINES</b>                         |                   |                     |                   |                     |                   |                   |
| Leptin, ng/mL                                       | 7.4 [3.1-14.3]    | 4.7 [1.9-9.5]       | 16.2 [7.6-33.5]   | 6.3 [4.0-24.5]      | 0.068             | 0.017             |
| Adiponectin, µg/mL                                  | 3.9 [1.9-7.4]     | 2.8 [1.5-6.1]       | 3.4 [2.3-5.5]     | 2.6 [1.8-6.4]       | 0.114             | 0.337             |
| Adiponectin/Leptin ratio                            | 0.5 [0.2-1.6]     | 0.5 [0.3-1.5]       | 0.2 [0.1-0.4]     | 0.4 [0.2-0.7]       | 0.760             | 0.064             |
| Resistin, ng/mL                                     | 18.1 [11.4-30.4]  | 24.0 [15.7-32.0]    | 18.5 [12.6-27.7]  | 21.5 [14.5-31.3]    | 0.139             | 0.229             |
| Visfatin, ng/mL                                     | 3.7 [3.0-4.8]     | 4.7 [3.9-6.5]       | 3.8 [3.1-5.3]     | 4.5 [3.4-6.3]       | 0.002             | 0.113             |
| IL-6, pg/mL                                         | 34.6 [19.6-49.9]  | 56.3 [35.2-113.6]   | 26.8 [21.1-42.0]  | 68.3 [36.5-124.1]   | <0.001            | <0.001            |
| IL-10, pg/mL                                        | 10.1 [7.2-13.2]   | 11.7 [6.6-15.3]     | 9.8 [7.7-12.1]    | 12.3 [9.1-19.0]     | 0.389             | 0.005             |
| TNF-α                                               | 50.9 [41.0-67.6]  | 70.3 [61.3-85.3]    | 60.5 [49.3-75.2]  | 72.9 [59.3-86.1]    | <0.001            | 0.006             |
| TNF-α /IL-10 ratio                                  | 5.8 [3.8-7.6]     | 6.4 [4.7-8.9]       | 5.9 [4.8-8.2]     | 5.2 [3.9-7.4]       | 0.176             | 0.155             |

Data are presented as median [IQR], or n and percentage. P-values are calculated using, Mann Whitney U, Chi-squared test or Fishers Exact Test. APACHE Acute Physiology And Chronic Health Evaluation, BMI body mass index, ECLS Extra Corporeal Life Support, ICU Intensive Care Unit. IL interleukin, MV mechanical ventilation, TNF tissue necrosis factor \*positive blood cultures, \*\*increase in serum creatinine by 26.5 µmol/L within 48h, or >1.5 times baseline within the prior 7 days, \*\*\*an increase in blood bilirubin, alanine transaminase or aspartate transaminase that is twice the upper limit of the normal range.
